# Supplementary material
Source: PubMed Central journal article supplement (PMC8634664)
Supplement: NIHMS1665675-supplement-1.pdf [file NIHMS1665675-supplement-1.pdf]

## Supplementary figures

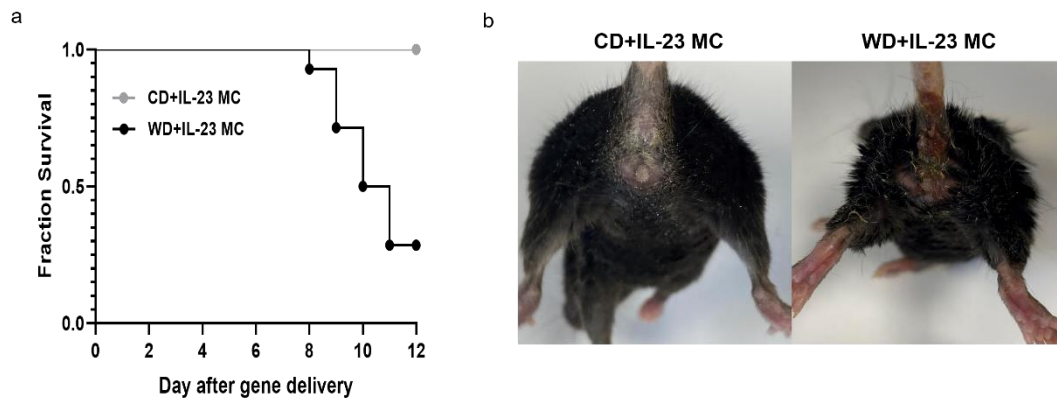

### Supplementary figure 1. WD-fed mice are intolerant of high dose IL-23 MC and exhibit gut symptoms

C57BL/6 mice were fed with a WD or an otherwise nutritionally matched control diet (CD) for 6 weeks and then injected with 10 ug IL-23 minicircle DNA (MC). (a)

Survival rate after gene delivery. (b) clinical photographs showing loose stool and diarrhea in WD-fed, IL-23 MC-treated mice at day 12 after gene delivery. 8 mice per group.

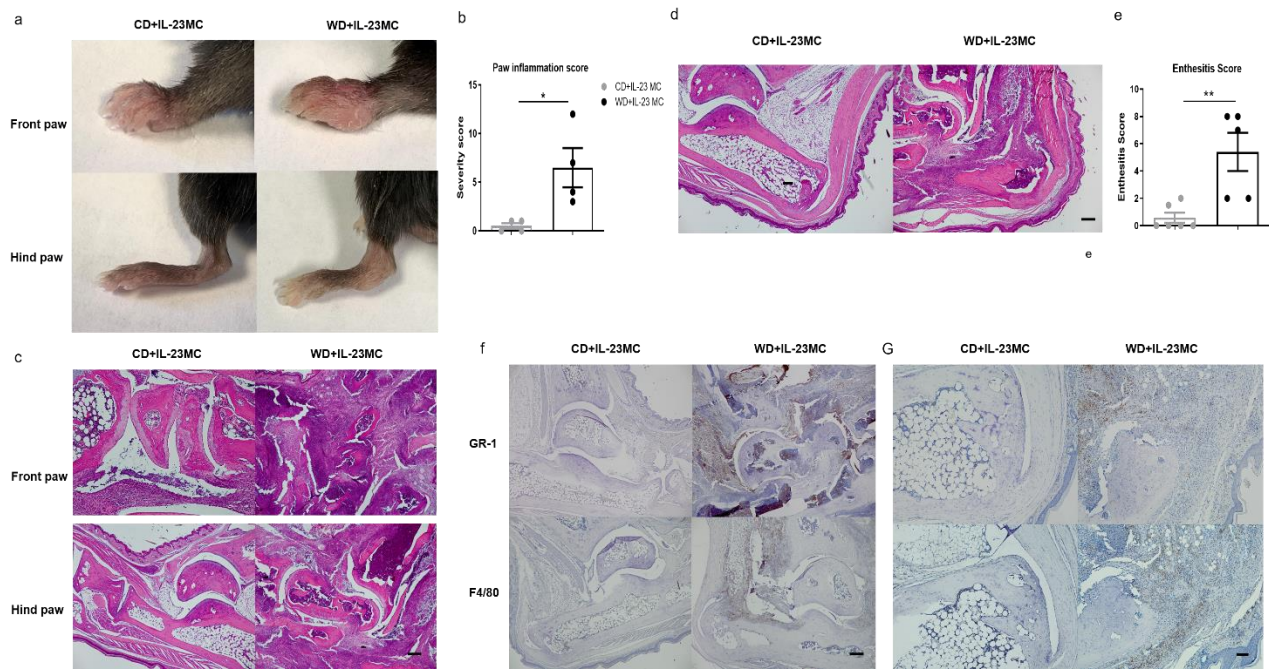

### Supplementary figure 2. Exposure to WD enhances susceptibility to IL-23-mediated joint inflammation in B10.RIII mice

B10.RIII mice were fed with a WD or CD for 6 weeks and then injected with 3  $\mu$ g of IL-23 MC. After MC delivery, mice were maintained on their respective diets for an additional 4 weeks. (a) Clinical photographs showing swollen joints and (b) score of paw inflammation from B10.RIII mice fed with CD or WD after IL-23 MC delivery. (c, d) Representative images of H&E section showing joint inflammation (c) and enthesitis (d) (scale bars, 200  $\mu$ m). (e) Enthesitis score. (f, g) Representative images of immunohistochemical staining GR-1 and F4/80 in ankle joints (f) and Achilles tendon (g) (scale bars, 100  $\mu$ m). All of the data are presented as mean  $\pm$  SEM. 4-5 mice per group. Data are representative of two independent experiments. \* p < 0.05, \*\* p < 0.01, by using Student's T test in (b, d).

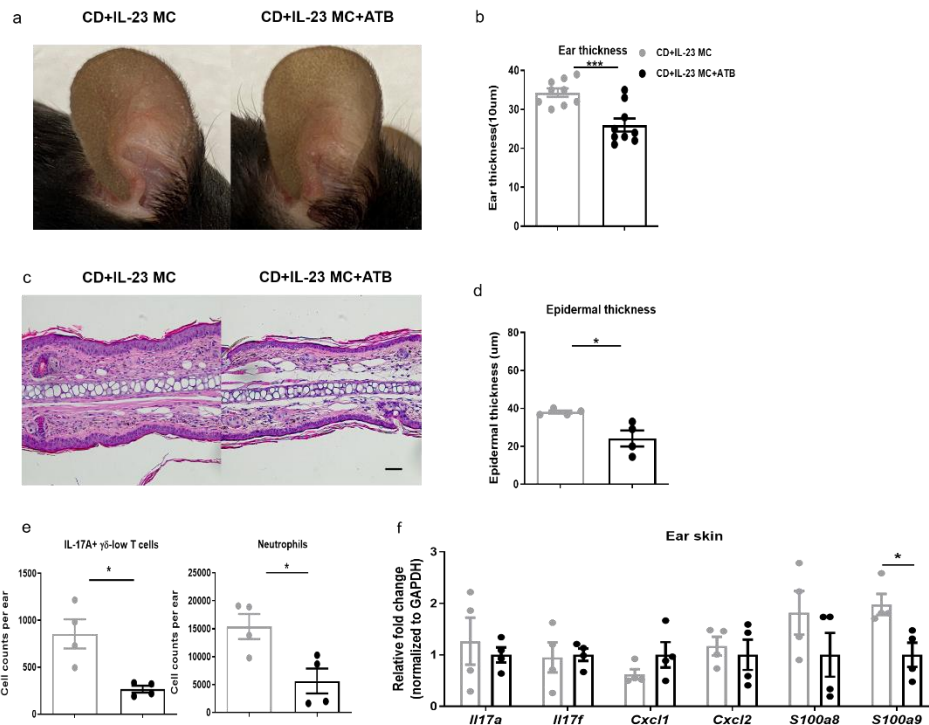

### Supplementary figure 3. Antibiotic treatment attenuates IL-23-driven skin inflammation

CD-fed C57BL/6 mice were treated with broad-spectrum combination antibiotics (ATB) or vehicle daily for 6 weeks by oral gavage before IL-23 MC delivery. (a) Representative photographs, (b) ear thickness, (c) image of H&E section (scale bars, 50  $\mu$ m), (d) histological analysis of epidermal thickness, (e) absolute numbers of IL-17A-producing  $\gamma\delta$ -low T cells and neutrophils, and (f) gene expression of proinflammatory markers in ear skin. All of the data are presented as mean  $\pm$  SEM. 4 mice per group. Data are representative of two independent experiments. \*  $p < 0.05$ , \*\*  $p < 0.01$ . \*\*\*  $p < 0.001$ , by using Student's T test.

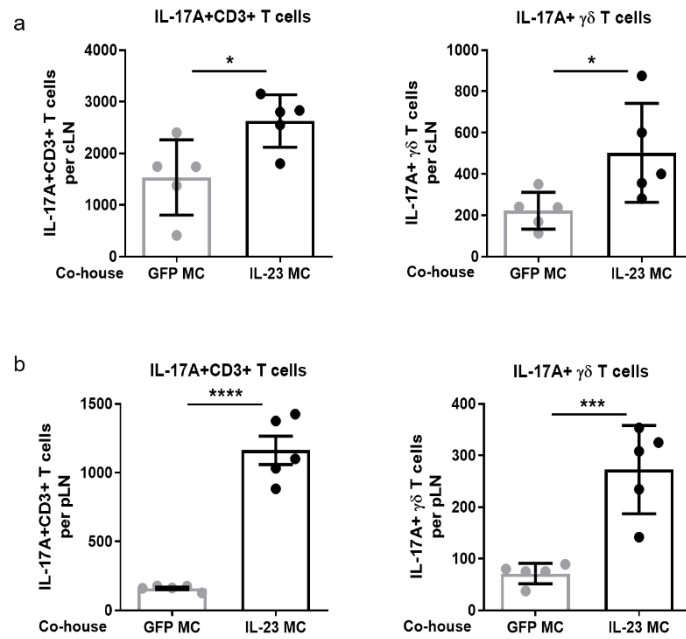

**Supplementary figure 4. Co-housing with IL-23 MC-injected mice potentiates IL-17 production by T cell in naïve mice.**

Immediately after gene delivery, IL-23 MC or GFP-MC-injected mice were co-housed with naïve mice for 4 weeks. Absolute numbers of IL-17A-producing CD3+ T cell and  $\gamma\delta$ -low T cells in per (a) cervical lymph node (cLN) or (b) popliteal lymph node (pLN) from naïve mice co-housed with GFP MC or IL-23 MC. All of the data are presented as mean $\pm$  SEM. 5 mice per group. Data are representative of two independent experiments. \*  $p < 0.05$ , \*\*\*  $p < 0.001$ , \*\*\*\*  $p < 0.0001$ , by using Student's T test.

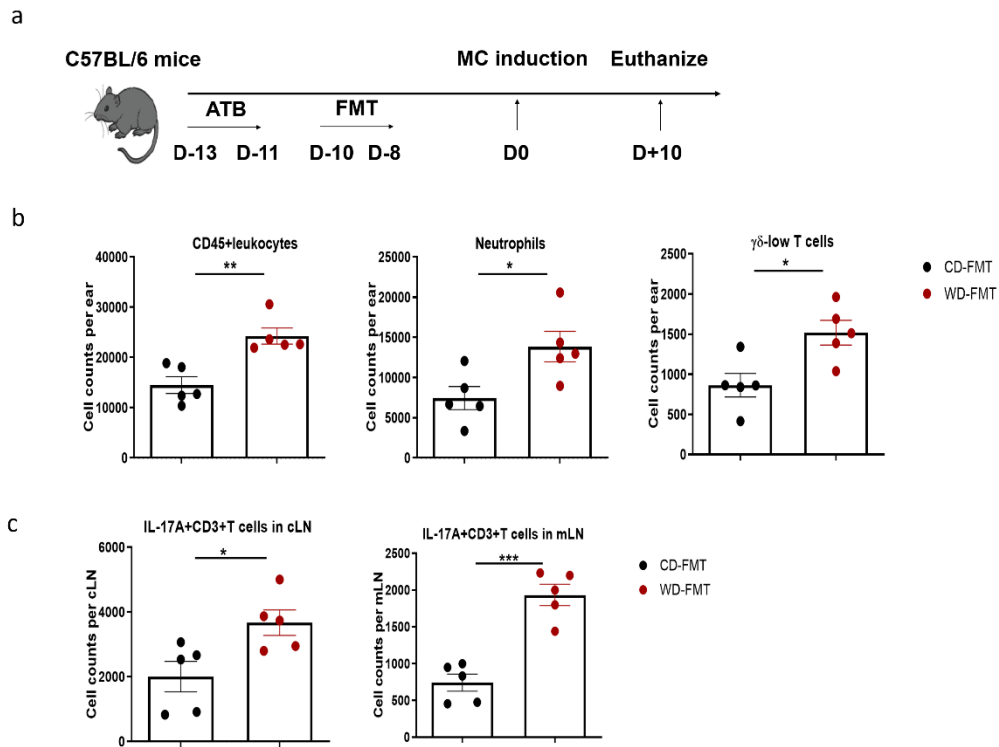

**Supplementary figure 5. Fecal microbiota transplantation (FMT) from WD-fed mice promotes inflammatory cellular infiltration in ear skin and draining lymph nodes**

(a) Experimental settings of fecal microbiota transplantation: fecal microbiome from CD or WD-fed mice was transplanted into SPF mice after 3 days of ATB treatment. One week later, the mice were injected with 5  $\mu$ g IL-23 MC and euthanized for further analysis at day 10 after MC delivery (B) Absolute numbers of CD45+leukocytes, neutrophils and  $\gamma\delta$ -low T cells in ear skin. (C) IL-17A-producing CD3+ T cell in per cervical lymph node (cLN) or mesenteric lymph node (mLN). All of the data are presented as mean  $\pm$  SEM. 5 mice per group. \*  $p < 0.05$ , \*\*  $p < 0.01$ , \*\*\*  $p < 0.001$ , by using Student's T test.

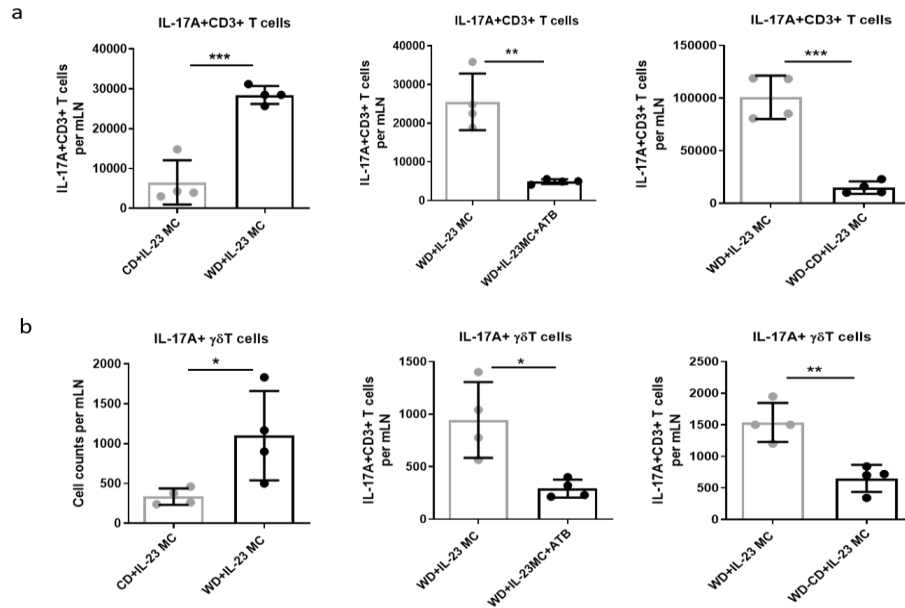

**Supplementary figure 6. WD intake is associated with accumulation of IL-17A-producing CD3+ T cells and  $\gamma\delta$  T cells in the mesenteric lymph nodes (mLN) of IL-23 MC-injected mice**

Absolute number of IL-17A-producing CD3+ T cells (a) and  $\gamma\delta$  T cells (b) in mesenteric lymph nodes (mLN) from CD or WD-fed mice injected with IL-23 MC (right panel), WD-fed, IL-23 MC-injected mice treated with vehicle or with broad coverage antibiotics (ATB) (middle panel), IL-23 MC-injected mice maintained on WD or switched from a WD to a CD. Determined by flow cytometry. \*  $p < 0.05$ , \*\*  $p < 0.01$ , \*\*\*  $p < 0.001$ , as calculated by two-tailed, unpaired Student's t test

## Supplementary table

Table S1.LefSe analysis showing significant differences in bacterial abundance between CD+GFP MC vs WD+GFP MC

|                         | Group     | LDA        | p-value    |
|-------------------------|-----------|------------|------------|
| ACTINOBACTERIA          |           |            |            |
| c_Actinobacteria        | CD+GFP MC | -3.3709671 | 0.0032759  |
| o_Bifidobacteriales     | CD+GFP MC | -3.3970199 | 0.00033107 |
| f_Bifidobacteriaceae    | CD+GFP MC | -3.3970201 | 0.00033107 |
| g_Bifidobacterium       | CD+GFP MC | -3.3970199 | 0.00033107 |
| BACTEROIDETES           |           |            |            |
| p_Bacteroidetes         | CD+GFP MC | -4.4009256 | 0.00077753 |
| c_Bacteroidia           | CD+GFP MC | -4.4009256 | 0.00077753 |
| o_Bacteroidales         | CD+GFP MC | -4.4009256 | 0.00077753 |
| f_Muribaculaceae        | CD+GFP MC | -4.3516401 | 0.00077753 |
| f_Rikenellaceae         | CD+GFP MC | -3.33347   | 0.01571435 |
| g_Alistipes             | CD+GFP MC | -3.33347   | 0.01571435 |
| FIRMICUTES              |           |            |            |
| s_Lactobacillus reuteri | CD+GFP MC | -3.3111563 | 0.02086258 |
| f_Clostridiaceae 1      | CD+GFP MC | -3.3952949 | 0.0004511  |
| g_Lachnospiraceae       | CD+GFP MC | -3.7755973 | 0.00457444 |
| NK4A136 group           |           |            |            |
| f_Peptococcaceae        | CD+GFP MC | -3.2647202 | 0.00632295 |
| g_Ruminococcaceae       | CD+GFP MC | -3.1794801 | 0.01571435 |
| UCG-014                 |           |            |            |
| PROTEOBACTERIA          |           |            |            |
| c_Gammaproteobacteria   | CD+GFP MC | -3.6811039 | 0.00075005 |
| ACTINOBACTERIA          |           |            |            |
| c_Coriobacteriia        | WD+GFP MC | 3.13056093 | 0.0356919  |

|                          |           |            |            |
|--------------------------|-----------|------------|------------|
| o_Coriobacteriales       | WD+GFP MC | 3.13056093 | 0.0356919  |
| f_Eggerthellaceae        | WD+GFP MC | 3.13012801 | 0.0356919  |
| g_Enterorhabdus          | WD+GFP MC | 3.27402233 | 0.01171869 |
| BACTEROIDETES            |           |            |            |
| s_Bacteroides vulgatus   | WD+GFP MC | 3.3821774  | 0.00457444 |
| FIRMICUTES               |           |            |            |
| p_Firmicutes             | WD+GFP MC | 4.28769996 | 0.00162919 |
| f_Streptococcaceae       | WD+GFP MC | 4.05805784 | 0.00077753 |
| g_Lactococcus            | WD+GFP MC | 4.06266488 | 0.00071008 |
| c_Clostridia             | WD+GFP MC | 4.20571634 | 0.00632295 |
| o_Clostridiales          | WD+GFP MC | 4.20571634 | 0.00632295 |
| g_Blautia                | WD+GFP MC | 4.02962376 | 0.00077753 |
| g_Lachnoclostridium      | WD+GFP MC | 3.36609571 | 0.00113133 |
| g_Roseburia              | WD+GFP MC | 3.41777984 | 0.00113133 |
| f_Peptostreptococcaceae  | WD+GFP MC | 3.69111219 | 0.0023221  |
| g_Romboutsia             | WD+GFP MC | 3.69114943 | 0.0023221  |
| f_Ruminococcaceae        | WD+GFP MC | 3.92648243 | 0.00077753 |
| g_Eubacterium            | WD+GFP MC | 3.81074759 | 0.00077753 |
| coprostanoligenes group  |           |            |            |
| g_Ruminiclostridium      | WD+GFP MC | 3.25579245 | 0.00865154 |
| g_Ruminiclostridium 9    | WD+GFP MC | 3.2650806  | 0.0023221  |
| g_Erysipelatoclostridium | WD+GFP MC | 3.53736056 | 0.00077753 |
| PROTEOBACTERIA           |           |            |            |
| p_Proteobacteria         | WD+GFP MC | 3.7491649  | 0.00077753 |
| c_Deltaproteobacteria    | WD+GFP MC | 3.775532   | 0.0004511  |
| o_Desulfovibrionales     | WD+GFP MC | 3.77963286 | 0.0004511  |
| f_Desulfovibrionaceae    | WD+GFP MC | 3.77830797 | 0.0004511  |
| g_Bilophila              | WD+GFP MC | 3.77496957 | 0.0004511  |

Table S2.LefSe analysis showing significant differences in bacterial abundance between CD+GFP MC vs CD+IL-23 MC

|                         | Group       | LDA        | p-value    |
|-------------------------|-------------|------------|------------|
| ACTINOBACTERIA          |             |            |            |
| c_Actinobacteria        | CD+GFP MC   | -3.4109273 | 0.00071008 |
| o_Bifidobacteriales     | CD+GFP MC   | -3.410463  | 0.00071008 |
| f_Bifidobacteriaceae    | CD+GFP MC   | -3.410463  | 0.00071008 |
| g_Bifidobacterium       | CD+GFP MC   | -3.410463  | 0.00071008 |
| FIRMICUTES              |             |            |            |
| g_Lactococcus           | CD+GFP MC   | -2.6455695 | 0.02727851 |
| f_Clostridiaceae 1      | CD+GFP MC   | -3.2792011 | 0.00033107 |
| f_Peptostreptococcaceae | CD+GFP MC   | -2.6354775 | 0.00119375 |
| g_Romboutsia            | CD+GFP MC   | -2.634685  | 0.00119375 |
| VERRUCOMICROBIOTA       |             |            |            |
| p_Verrucomicrobia       | CD+GFP MC   | -2.9566109 | 0.02727851 |
| c_Verrucomicrobiae      | CD+GFP MC   | -2.9566104 | 0.02727851 |
| o_Verrucomicrobiales    | CD+GFP MC   | -2.9566105 | 0.02727851 |
| f_Akkermansiaceae       | CD+GFP MC   | -2.9566114 | 0.02727851 |
| g_Akkermansia           | CD+GFP MC   | -2.9566113 | 0.02727851 |
| ACTINOBACTERIA          |             |            |            |
| c_Coriobacteriia        | CD+IL-23 MC | 2.47356973 | 0.01571435 |
| o_Coriobacteriales      | CD+IL-23 MC | 2.47356973 | 0.01571435 |
| f_Eggerthellaceae       | CD+IL-23 MC | 2.47445485 | 0.01571435 |
| g_Enterorhabdus         | CD+IL-23 MC | 2.57044068 | 0.01571435 |
| BACTEROIDETES           |             |            |            |
| f_Bacteroidaceae        | CD+IL-23 MC | 3.60438822 | 0.04599937 |
| g_Bacteroides           | CD+IL-23 MC | 3.60438822 | 0.04599937 |
| g_Muribaculum           | CD+IL-23 MC | 3.42924478 | 0.00033107 |

|                                       |             |            |            |
|---------------------------------------|-------------|------------|------------|
| FIRMICUTES                            |             |            |            |
| g_Eubacterium fissicatena group       | CD+IL-23 MC | 3.35610481 | 0.01171869 |
| g_Marvinbryantia                      | CD+IL-23 MC | 3.19867631 | 0.0032759  |
| g_Eubacterium coprostanoligenes group | CD+IL-23 MC | 2.83861331 | 0.02742315 |
| g_Erysipelatoclostridium              | CD+IL-23 MC | 2.8275634  | 0.00162919 |
| PROTEOBACTERIA                        |             |            |            |
| g_Escherichia-Shigella                | CD+IL-23 MC | 2.91170909 | 0.01065638 |

Table S3.LEfSe analysis showing significant differences in bacterial abundance between WD+GFP MC vs WD+IL-23 MC

|                         | Group     | LDA        | p-value    |
|-------------------------|-----------|------------|------------|
| ACTINOBACTERIA          |           |            |            |
| p_Actinobacteria        | WD+GFP MC | -2.9237788 | 0.00162919 |
| c_Coriobacteriia        | WD+GFP MC | -2.9988012 | 0.00077753 |
| o_Coriobacteriales      | WD+GFP MC | -2.9988012 | 0.00077753 |
| f_Eggerthellaceae       | WD+GFP MC | -2.9993678 | 0.00077753 |
| g_Enterorhabdus         | WD+GFP MC | -2.9993678 | 0.00077753 |
| BACTEROIDETES           |           |            |            |
| s_Bacteroides uniformis | WD+GFP MC | -2.7788784 | 0.01571435 |
| FIRMICUTES              |           |            |            |
| p_Firmicutes            | WD+GFP MC | -4.1345015 | 0.02086258 |
| f_Streptococcaceae      | WD+GFP MC | -3.9622695 | 0.00162919 |
| g_Lactococcus           | WD+GFP MC | -3.9730832 | 0.00113133 |
| c_Clostridia            | WD+GFP MC | -4.4770553 | 0.00077753 |
| o_Clostridiales         | WD+GFP MC | -4.4770553 | 0.00077753 |
| f_Lachnospiraceae       | WD+GFP MC | -4.2426095 | 0.00162919 |
| g_Blautia               | WD+GFP MC | -3.9571942 | 0.00113133 |

|                                           |             |            |            |
|-------------------------------------------|-------------|------------|------------|
| g_GCA-900066575                           | WD+GFP MC   | -2.8351544 | 0.01571435 |
| g_Lachnoclostridium                       | WD+GFP MC   | -3.0834075 | 0.02086258 |
| g_Roseburia                               | WD+GFP MC   | -3.3235807 | 0.01171869 |
| f_Peptostreptococcaceae                   | WD+GFP MC   | -3.7043471 | 0.00033107 |
| g_Romboutsia                              | WD+GFP MC   | -3.7043472 | 0.00033107 |
| f_Ruminococcaceae                         | WD+GFP MC   | -3.8942809 | 0.00113133 |
| g__Eubacterium<br>coprostanoligenes group | WD+GFP MC   | -3.6369589 | 0.00077753 |
| g_Ruminiclostridium                       | WD+GFP MC   | -2.9143861 | 0.04599937 |
| g_Ruminiclostridium 9                     | WD+GFP MC   | -3.0519789 | 0.0023221  |
| PROTEOBACTERIA                            |             |            |            |
| c_Deltaproteobacteria                     | WD+GFP MC   | -3.6301281 | 0.0007706  |
| o_Desulfovibrionales                      | WD+GFP MC   | -3.6301281 | 0.0007706  |
| f_Desulfovibrionaceae                     | WD+GFP MC   | -3.6301281 | 0.0007706  |
| g_Bilophila                               | WD+GFP MC   | -3.6301281 | 0.0007706  |
| ACTINOBACTERIA                            |             |            |            |
| o_Bifidobacteriales                       | WD+IL-23 MC | 2.75585155 | 0.02727851 |
| f_Bifidobacteriaceae                      | WD+IL-23 MC | 2.75585085 | 0.02727851 |
| g_Bifidobacterium                         | WD+IL-23 MC | 2.75585835 | 0.02727851 |
| BACTEROIDETES                             |             |            |            |
| g_Muribaculum                             | WD+IL-23 MC | 2.98171199 | 0.00119375 |
| FIRMICUTES                                |             |            |            |
| f_Lactobacillaceae                        | WD+IL-23 MC | 4.36160915 | 0.0023221  |
| g_Lactobacillus                           | WD+IL-23 MC | 4.36160915 | 0.0023221  |
| s_Lactobacillus johnsonii                 | WD+IL-23 MC | 4.2429784  | 0.00113133 |
| s_Lactobacillus reuteri                   | WD+IL-23 MC | 3.64555757 | 0.00077753 |
| PROTEOBACTERIA                            |             |            |            |
| c_Gammaproteobacteria                     | WD+IL-23 MC | 3.45878598 | 0.00845642 |
| o_Enterobacteriales                       | WD+IL-23 MC | 3.39775424 | 0.00138379 |

|                        |             |            |            |
|------------------------|-------------|------------|------------|
| f_Enterobacteriaceae   | WD+IL-23 MC | 3.39770803 | 0.00138379 |
| g_Escherichia-Shigella | WD+IL-23 MC | 3.39590036 | 0.00138379 |
| VERRUCOMICROBIA        |             |            |            |
| p_Verrucomicrobia      | WD+IL-23 MC | 3.8128162  | 0.01359026 |
| c_Verrucomicrobiae     | WD+IL-23 MC | 3.81281372 | 0.01359026 |
| o_Verrucomicrobiales   | WD+IL-23 MC | 3.8126245  | 0.01359026 |
| f_Akkermansiaceae      | WD+IL-23 MC | 3.8128661  | 0.01359026 |
| g_Akkermansia          | WD+IL-23 MC | 3.81270656 | 0.01359026 |

Table S4.LefSe analysis showing significant differences in bacterial abundance between CD+IL-23 MC vs WD+IL-23 MC

|                         | Group       | LDA        | p-value    |
|-------------------------|-------------|------------|------------|
| ACTINOBACTERIA          |             |            |            |
| p_Actinobacteria        | CD+IL-23 MC | -3.1644044 | 0.0032759  |
| c_Coriobacteriia        | CD+IL-23 MC | -3.2227457 | 0.00077753 |
| o_Coriobacteriales      | CD+IL-23 MC | -3.2227457 | 0.00077753 |
| f_Eggerthellaceae       | CD+IL-23 MC | -3.2250688 | 0.00077753 |
| g_Enterorhabdus         | CD+IL-23 MC | -3.3535624 | 0.00077753 |
| BACTEROIDETES           |             |            |            |
| p_Bacteroidetes         | CD+IL-23 MC | -4.3183134 | 0.00077753 |
| c_Bacteroidia           | CD+IL-23 MC | -4.3183134 | 0.00077753 |
| o_Bacteroidales         | CD+IL-23 MC | -4.3183134 | 0.00077753 |
| s_Bacteroides uniformis | CD+IL-23 MC | -3.1796248 | 0.02742315 |
| f_Muribaculaceae        | CD+IL-23 MC | -4.2766478 | 0.00077753 |
| g_Muribaculum           | CD+IL-23 MC | -3.3164794 | 0.00457444 |
| FIRMICUTES              |             |            |            |
| c_Clostridia            | CD+IL-23 MC | -4.0332464 | 0.02086258 |
| o_Clostridiales         | CD+IL-23 MC | -4.0332464 | 0.02086258 |
| f_Lachnospiraceae       | CD+IL-23 MC | -4.0459742 | 0.01571435 |

|                            |             |            |            |
|----------------------------|-------------|------------|------------|
| g_Lachnospiraceae          | CD+IL-23 MC | -3.8612131 | 0.00457444 |
| NK4A136 group              |             |            |            |
| g_Marvinbryantia           | CD+IL-23 MC | -3.3065505 | 0.00632295 |
| f_Peptococcaceae           | CD+IL-23 MC | -2.8473479 | 0.02742315 |
| g_Ruminococcaceae          | CD+IL-23 MC | -3.2407539 | 0.0016163  |
| UCG-014                    |             |            |            |
| FIRMICUTES                 |             |            |            |
| p_Firmicutes               | WD+IL-23 MC | 3.88873566 | 0.0356919  |
| p_Firmicutes.c_Bacilli     | WD+IL-23 MC | 4.22438416 | 0.02086258 |
| o_Lactobacillales          | WD+IL-23 MC | 4.22422884 | 0.02086258 |
| f_Lactobacillaceae         | WD+IL-23 MC | 4.15199303 | 0.02742315 |
| g_Lactobacillus            | WD+IL-23 MC | 4.15199303 | 0.02742315 |
| ps_Lactobacillus johnsonii | WD+IL-23 MC | 4.1659165  | 0.0032759  |
| s_Lactobacillus reuteri    | WD+IL-23 MC | 3.38202644 | 0.0032759  |
| f_Streptococcaceae         | WD+IL-23 MC | 3.38551607 | 0.00077753 |
| g_Lactococcus              | WD+IL-23 MC | 3.36078742 | 0.00033107 |
| g_Eubacterium              | WD+IL-23 MC | 3.21631479 | 0.01571435 |
| coprostanoligenes group    |             |            |            |
| g_Ruminiclostridium        | WD+IL-23 MC | 3.16956133 | 0.00865154 |
| PROTEOBACTERIA             |             |            |            |
| c_Deltaproteobacteria      | WD+IL-23 MC | 3.07346608 | 0.00777396 |
| o_Desulfovibrionales       | WD+IL-23 MC | 3.07346012 | 0.00777396 |
| p_f_Desulfovibrionaceae    | WD+IL-23 MC | 3.07346056 | 0.00777396 |
| g_Bilophila                | WD+IL-23 MC | 3.07346539 | 0.00777396 |
| o_Enterobacteriales        | WD+IL-23 MC | 3.33757117 | 0.0061699  |
| f_Enterobacteriaceae       | WD+IL-23 MC | 3.33757117 | 0.0061699  |
| g_Escherichia-Shigella     | WD+IL-23 MC | 3.33647703 | 0.0061699  |
| VERRUCOMICROBIA            |             |            |            |
| p_Verrucomicrobia          | WD+IL-23 MC | 3.78326837 | 0.00377634 |

|                      |             |            |            |
|----------------------|-------------|------------|------------|
| c_Verrucomicrobiae   | WD+IL-23 MC | 3.7832684  | 0.00377634 |
| o_Verrucomicrobiales | WD+IL-23 MC | 3.78326838 | 0.00377634 |
| f_Akkermansiaceae    | WD+IL-23 MC | 3.78326812 | 0.00377634 |
| g_Akkermansia        | WD+IL-23 MC | 3.78326836 | 0.00377634 |

Table S5.LefSe analysis showing significant differences in bacterial abundance between mice maintained on WD or changed to CD

|                         | Group          | LDA        | p-value    |
|-------------------------|----------------|------------|------------|
| FIRMICUTES              |                |            |            |
| f_Enterococcaceae       | WD+IL-23 MC    | -3.4235587 | 0.01796048 |
| g_Enterococcus          | WD+IL-23 MC    | -3.4149562 | 0.01796048 |
| f_Streptococcaceae      | WD+IL-23 MC    | -3.3316662 | 0.02092134 |
| g_Lactococcus           | WD+IL-23 MC    | -3.3037131 | 0.01387441 |
| f_Peptostreptococcaceae | WD+IL-23 MC    | -3.7231472 | 0.0472209  |
| g_Terrisporobacter      | WD+IL-23 MC    | -3.6841821 | 0.0472209  |
| PROTEOBACTERIA          |                |            |            |
| p_Proteobacteria        | WD+IL-23 MC    | -4.1895841 | 0.04330814 |
| g_Proteus               | WD+IL-23 MC    | -3.1217528 | 0.0472209  |
| ACTINOBACTERIA          |                |            |            |
| p_Actinobacteria        | WD-CD+IL-23 MC | 3.04115681 | 0.04330814 |
| c_Coriobacteriia        | WD-CD+IL-23 MC | 3.22580609 | 0.01796048 |
| o_Coriobacteriales      | WD-CD+IL-23 MC | 3.27132947 | 0.01796048 |
| f_Eggerthellaceae       | WD-CD+IL-23 MC | 3.2607899  | 0.01796048 |
| g_Enterorhabdus         | WD-CD+IL-23 MC | 3.19431696 | 0.01796048 |
| BACTEROIDETES           |                |            |            |
| p_Bacteroidetes         | WD-CD+IL-23 MC | 4.19687782 | 0.02092134 |
| c_Bacteroidia           | WD-CD+IL-23 MC | 4.22877569 | 0.02092134 |
| o_Bacteroidales         | WD-CD+IL-23 MC | 4.21918187 | 0.02092134 |

|                          |                |            |            |
|--------------------------|----------------|------------|------------|
| f_Muribaculaceae         | WD-CD+IL-23 MC | 4.12112275 | 0.01796048 |
| g_Muribaculum            | WD-CD+IL-23 MC | 3.25353442 | 0.01796048 |
| f_Rikenellaceae          | WD-CD+IL-23 MC | 3.24143461 | 0.01796048 |
| g_Alistipes              | WD-CD+IL-23 MC | 3.24826259 | 0.01796048 |
| FITMICUTES               |                |            |            |
| c_Erysipelotrichia       | WD-CD+IL-23 MC | 3.02895531 | 0.04330814 |
| o_Erysipelotrichales     | WD-CD+IL-23 MC | 2.97466396 | 0.04330814 |
| f_Erysipelotrichaceae    | WD-CD+IL-23 MC | 3.00226158 | 0.04330814 |
| g_Erysipelatoclostridium | WD-CD+IL-23 MC | 3.20046775 | 0.01796048 |

## **Supplementary methods**

### **Mice**

C57BL/6 mice or B10.RIII-H2r H2-T18b/(71NS)SnJ (B10.RIII) were purchased from The Jackson Laboratory (Bar Harbor, ME) and used in institutionally approved animal protocols (University of California, Davis). Mice with different treatment were not co-housed unless stated otherwise. Mice within a treatment group were distributed across multiple cages to reduce cage effects.

### **Production and purification of GFP and IL-23 minicircle (MC) DNA and hydrodynamic delivery**

Minicircle-RSV.Flag.mIL23.elasti.bpA or RSV.eGFP.bpA was produced as described (Chen et al., 2005). To produce minicircle-RSV.Flag.mIL23.elasti.bpA or RSV.eGFP.bpA, a single isolated colony from a fresh plate was grown for 8 h in 2 ml of Luria–Bertani broth with kanamycin. Eight hundred microliters of this culture was used to inoculate 1 L of Terrific broth and grown for an additional 17 h. Overnight, cultures were centrifuged at 20°C, 4000 rpm for 20 min. The pellet was resuspended at 4:1 (v/v) in fresh Luria–Bertani broth containing 1% L-arabinose. The bacteria were incubated at 32°C with constant shaking at 220 rpm for 2 h. After adding half volume of fresh low-salt Luria–Bertani broth (pH 8.0) containing 1% L-arabinose, the incubation temperature was increased to 37°C and the incubation was continued for an additional 2h. Episomal DNA minicircles (MC) were prepared from bacteria using EndoFree Megaprep plasmid purification kits from Qiagen (Chatsworth, CA)

according to the manual instruction.

Hydrodynamic delivery of IL-23 or GFP MC DNA via tail vein injection was performed as previously described (Adamopoulos et al., 2011). MC was prepared in lactated ringers solution and administrated by hydrodynamic delivery into the tail vein.

Mice were mechanically restrained and received a volume of 10% bodyweight within a period of 5–7 s. Serum IL-23 was assayed using an ELISA kit purchased from Invitrogen (Waltham, MA) in accordance with the manufacturer's instructions.

The IL-23 minicircle (MC)-based murine model has several advantages: first, hydrodynamic delivery of IL-23 MC results in persistent, high-level of IL-23 gene expression and induces strong phenotype of psoriatic inflammation over 2 months, thus providing enough window period to test the influence of diet (or change of diet pattern) on established disease; second, this model developed concurrent skin and joint changes that have some of the features found in human psoriatic skin and joints, allowing us to study the two major sequellae of psoriasis, PsD and PsA, at the same time; moreover, contrast to other transgenic mice models, we can easily modify the degree of the inflammation by tittering the dose of MC.

However this model is dominated by IL-23/IL-17A axis, it may have limitations in studying other pathways like TNF $\alpha$ .

### **Sample preparation for flow cytometry**

Anti-mouse  $\gamma\delta$ -TCR (clone GL3), CD45 (30-F11), CD3(17A2),CCR6 (29-2L17), CD11b (M1/70), Ly6G (IA8) antibodies were purchased from BioLegend (San Diego,

CA). Anti-IL-17A (eBio17B7) antibody was purchased from eBioscience (San Diego, CA). Whole ear skin was minced and digested with Liberase TM (Roche, Mannheim) and DNase I (Sigma-Aldrich) with addition of 5% fetal bovine serum to obtain whole skin cell suspensions before passing tissue through a 70-um cell strainer. Single-cell suspensions from the cervical draining or popliteal lymph nodes were prepared by mashing the tissue through a 70-um cell strainer. Intracellular staining was done after incubating cells for 2 hours with cell stimulation cocktail (eBioscience). Anti-mouse CD16/32 (BD Biosciences, San Jose, CA) was added to cells prior to staining to block binding to Fc-receptors.

### **Evaluation of joints and enthesitis with disease scoring**

Disease severity for each limb was recorded as described before (Bouchareychas et al., 2017): 0, normal; 1, erythema and swelling of one digit; 2, erythema and swelling of two digits; 3, erythema and swelling of more than two digits and/or swelling of an ankle joint. The clinical arthritis score is defined as the sum of the scores for all four paws of each mouse.

Achilles tendon enthesitis was scored on three parameters (Jacques et al., 2014): infiltrate in the Achilles tendon, calcaneal erosion, and exudate at the synovio-entheseal complex. Each parameter was graded on a scale of 0-3, where 0=normal; 1=mild; 2=moderate and 3=severe. The maximum composite score for Achilles tendon enthesitis was 9.

### **Histopathological analysis and immunohistochemistry (IHC)**

Formaldehyde-fixed, paraffin-embedded ear skin samples were stained with H&E using standard procedures. The paw tissue was decalcified with 4% formic acid before embedding. Images were acquired using a Nikon Optiphot 2 microscope (Nikon, Tokyo, Japan). Epidermal thickness was measured with a computer-assisted quantitative image analysis software (ImageJ).

For immunohistochemical analysis, skin sections were incubated with primary antibodies against murine Ki-67, p-stat3, Gr-1, F4/80, followed by the appropriate secondary antibodies. Rinsed sections were counterstained with hematoxylin.

### **Quantitative real-time PCR**

Total RNA of mouse ear skin was extracted using a RNeasy Fibrous Tissue Kit (Qiagen, Hilden, Germany). For paw tissue, the skin was removed from the hind paw before further extraction. Quantitative real-time PCR was performed using Quant Studio 3 real-time PCR system (Applied Biosystems, Foster City, CA). The primers were obtained from Integrated DNA Technologies, Inc (Skokie, IL). The following primers were pre-designed (otherwise the sequence are shown) and obtained from Integrated DNA Technologies, Inc (Skokie, IL, USA):

| <b>Gene name</b> | <b>Identifier or sequence</b> |
|------------------|-------------------------------|
| Gapdh            | Mm.PT.39a.1                   |
| <i>Il17a</i>     | Mm.PT.58.6531092),            |
| <i>Il17f</i>     | Mm.PT.58.9739903),            |
| <i>Cxcl1</i>     | Mm.PT.58.42076891             |
| <i>Cxcl2</i>     | Mm.PT.58.10456839             |
| <i>S100a8</i>    | Mm.PT.58.44003402             |

|                  |                   |
|------------------|-------------------|
| <i>S100a9</i>    | Mm.PT.58.41787562 |
| <i>Il1b</i>      | Mm.PT.58.41616450 |
| <i>Il6</i>       | Mm.PT.58.10005566 |
| <i>Tnf</i>       | Mm.PT.58.12575861 |
| <i>Tnfsf11</i>   | Mm.PT.58.29202697 |
| <i>Tnfrsf11b</i> | Mm.PT.58.41494681 |

### **Antibiotic Treatment**

Mice were given oral gavage of antibiotics (ATB-treated group) or water (vehicle-treated group) on a daily basis throughout the duration of the experiment. The antibiotic cocktail was comprised of four antibiotics and ampicillin (100 mg/kg), vancomycin (50 mg/kg), metronidazole (100 mg/kg), neomycin (100 mg/kg), amphotericin B (1 mg/kg, Amresco Inc). Amphotericin B was added to prevent fungal overgrowth or opportunistic infections.

### **Sequencing of microbial communities**

DNA was isolated using the Qiagen DNeasy PowerSoil Pro kit (Qiagen) with the following modification: After addition of buffer CD1, samples were incubated at 65°C for 10 minutes and then subjected to homogenization using a Biospec Mini-Beadbeater (Biospec Products) for 2 minutes. Samples were eluted in 100 ul of buffer C6. Primers 341F (TCGTCGGCAGCGTCAGATGTGTATAAGAGACAG (spacer) TGCCTACGGGNGGCWGCAG) and 806R (GTCTCGTGGGCTCGGAGATGT-GTATAAGAGACAG (spacer) CCGGACTACNVGGGTWTCTAAT) were used to amplify the V3-V4 domain of the

16S rRNA using a two-step PCR procedure. In step one of the amplification procedure, both forward and reverse primers contained an Illumina tag sequence (), a variable length spacer (no spacer, A, CA, or GCA for 341F; no spacer, G, TG, ATG for 806R) to increase diversity and improve the quality of the sequencing run, a linker sequence (), and the 16S target sequence (). Each 25 µl PCR reaction contained 1 Unit Kapa2G Robust Hot Start Polymerase (Kapa Biosystems), 1.5 mM MgCl<sub>2</sub>, 0.2 mM final concentration dNTP mix, 0.2 mM final concentration of each primer, and 1 µl of DNA for each sample. PCR conditions were: an initial incubation at 95°C for 3 min, followed by 25 cycles of 95°C for 45 s, 50°C for 30 s, 72°C for 30 s and a final extension of 72°C for 3 min. In step two, each sample was barcoded with a unique forward and reverse barcode combination using forward primers (AATGATACGGCGACCACCGAGATCTA-CACNNNNNNNNT-CGTCGGCAGC GTC) with an Illumina P5 adapter sequence (), a unique 8 nt barcode (N), a partial matching sequence of the forward adapter used in step one (), and reverse primers (CAAGCAGAAGACGGCATA-CGAGATNNNN-NNNNGTCTCGTGGGCTCGG) with an Illumina P7 adapter sequence (), unique 8 nt barcode (N), and a partial matching sequence of the reverse adapter used in step one (). The PCR reaction in step two contained 1 Unit Kapa2G Robust Hot Start Polymerase (Kapa Biosystems), 1.5 mM MgCl<sub>2</sub>, 0.2 mM final concentration dNTP mix, 0.2 mM final concentration of each uniquely barcoded primer, and 1 µl of the product from the PCR

reaction in step one diluted at a 10:1 ratio in water. PCR conditions were: an initial incubation at 95°C for 3 min, followed by 9 cycles of 95°C for 30 s, 58°C for 30 s, 72°C for 30 s and a final extension of 72°C for 3 min.

The final product was quantified on the Qubit instrument using the Qubit High Sensitivity dsDNA kit (Invitrogen), and individual amplicons were pooled in equal concentrations. The pooled library was cleaned utilizing Ampure XP beads (Beckman Coulter) then checked for quality and proper amplicon size on an Agilent 2100 Bioanalyzer (Agilent Technologies). The library was quantified via qPCR followed by 300-bp paired-end sequencing using an Illumina MiSeq instrument (Illumina) in the Genome Center DNA Technologies Core, University of California, Davis. DNA extractions and library preparation were performed by the UC Davis Host Microbe Systems Biology Core Facility.

### **Bioinformatics**

Demultiplexing of the raw FASTQ files and adapter trimming of sequences were performed using dbcAmplicons version 0.8.5. (<https://github.com/msettles/dbcAmplicons>). Each sequence was assigned to its given sample based on the given forward and reverse barcode. Reads that did not match any barcode were discarded (failed to meet minimum quality thresholds). The unmerged forward and reverse reads were imported into QIIME2 version 2020.2 (<https://qiime2.org>), and sequence variants were determined following the DADA2 analysis pipeline. Sequences that were only observed one time or only in a single

sample were discarded and chimeras were detected and filtered from paired-end reads. After quality filtering, sequences were clustered into amplicon sequence variants (ASVs). Comparison of clustered sequences were performed and taxonomic classification was assigned using a Naive Bayes filtered classifier trained on the 99% identity SILVA database, version 132. Principal Coordinates Analysis (PCoA) and alpha diversity analysis were performed using the Phyloseq R package (<https://doi.org/10.1371/journal.pone.0061217>) (unrarified reads). To identify differentially abundant taxa among groups LEfSe analysis were performed using the galaxy web application (<http://huttenhower.sph.harvard.edu/galaxy/>). Differences between groups were considered significant when the logarithmic LDA score was  $>2.0$  and the p value was  $<0.05$ .

### **Fecal microbiota transplantation (FMT)**

The endogenous intestinal microbiota of 8-week old SPF mice was depleted by gavage with broad-spectrum antibiotics for 3 days. The antibiotic cocktail was comprised of four antibiotics, including ampicillin (100 mg/kg), vancomycin (50 mg/kg), metronidazole (100 mg/kg) and neomycin (100 mg/kg) as described (Zhang et al., 2020). The recipient mice were maintained on chow diet throughout the whole experiment. Fresh murine fecal samples were collected directly from the rectums of age- and sex-matched donor mice fed with WD or CD for 6 weeks. The pooled feces were resuspended in sterile PBS (1 mL of PBS/0.2 g of fecal pellet, about 10–12 fecal pellets), homogenized completely with beads and vortex 3x for 1

min each. Homogenates were centrifuged at 800 x g for 3 min and then filtered the by passing through a 70 µm cell strainer. 200 µL of prepared fecal fluid was administered to the microbiota-depleted mice via oral gavage once a day for 3 days.

### **Statistical analysis**

All data are shown as mean  $\pm$  SEM. Data were analyzed using GraphPad Prism version 6 (GraphPad Software, San Diego, CA). A two-sided unpaired Student's t-test was used to compare two groups, and one-way analysis of variance (ANOVA) Bonferroni post hoc test was used for multiple comparisons unless stated otherwise. The significance of PCoA was assessed by Permanova Test with p value corrected for multiple testing using the Bonferroni method. A p-value less than 0.05 was considered statistically significant.

### **Reference**

- Adamopoulos IE, Tessmer M, Chao CC, Adda S, Gorman D, Petro M, et al. IL-23 is critical for induction of arthritis, osteoclast formation, and maintenance of bone mass. *J Immunol* 2011;187(2):951-9.
- Bouchareychas L, Grossinger EM, Kang M, Qiu H, Adamopoulos IE. Critical Role of LTB4/BLT1 in IL-23-Induced Synovial Inflammation and Osteoclastogenesis via NF- $\kappa$ B. *J Immunol* 2017;198(1):452-60.
- Chen ZY, He CY, Kay MA. Improved production and purification of minicircle DNA vector free of plasmid bacterial sequences and capable of persistent transgene expression in vivo. *Hum Gene Ther* 2005;16(1):126-31.
- Jacques P, Lambrecht S, Verheugen E, Pauwels E, Kollias G, Armaka M, et al. Proof of concept: enthesitis and new bone formation in spondyloarthritis are driven by mechanical strain and stromal cells. *Ann Rheum Dis* 2014;73(2):437-45.
- Zhang Q, Lu Q, Luo Y. Fecal Microbiota Transplantation and Detection of Prevalence of IgA-Coated Bacteria in the Gut. *J Vis Exp* 2020(161).
